# Supplementary material for: STEAM‐ME: A Novel Model for Successful Kaizen Implementation and Sustainable Performance of SMEs in Vietnam
Source: Hindawi journal article supplement (doi:10.1155/2019/6048195), 2019-01-01
Supplement: f1 [file 6048195.f1.pdf]

## APPENDIX I

### ***References for the rational validation of six key factors presented in Table II.1***

- Abolhassani A., Layfield K., Gopalakrishnan B. (2016), Lean and US manufacturing industry: Popularity of practices and implementation barriers, *International Journal of Productivity and Performance Management*, 65(7), 875–897; DOI: 10.1108/ijppm-10-2014-0157.
- Adams M., Schroer B.J., Stewart S.K. (1997), QuickStep™ process improvement: Time-compression as a management strategy, *Engineering Management Journal*, 9(2), 21–32, DOI: 10.1080/10429247.1997.11414937.
- Adamson B., Kwolek S. (2008), Strategy, leadership and change: The north york general hospital transformation journey, *Healthcare Quarterly*, 11(3), 50–53, DOI: 10.12927/hcq.2008.19856.
- Adler P.S., Goldoftas B., Levine, D.I. (1999), Flexibility versus efficiency? A case study of model changeovers in the Toyota production system, *Organization Science*, 10(1), 43–68, DOI: 10.1287/orsc.10.1.43.
- Ahmed P.K., Loh A.Y.E., Zairi M. (1999), Cultures for continuous improvement and learning, *Total Quality Management*, 10(4-5), 426–434, DOI: 10.1080/0954412997361.
- Aken E.M.V., Farris J.A., Glover W.J., Letens G. (2010), A framework for designing, managing, and improving Kaizen event programs, *International Journal of Productivity and Performance Management*, 59(7), 641–667, DOI: 10.1108/17410401011075648.
- Alukal G., Manos A. (2006), *Lean Kaizen: A simplified approach to process improvements*, ASQ Quality Press, Milwaukee, WI.
- Anand G., Kodali R. (2010), Development of a framework for implementation of lean manufacturing systems, *International Journal of Management Practice*, 4(1), 95–116, DOI: 10.1504/ijmp.2010.029705.
- Anand G., Ward P.T., Tatikonda M.V., Schilling D.A. (2009), Dynamic capabilities through continuous improvement infrastructure, *Journal of Operations Management*, 27(6), 444–461, DOI: 10.1016/j.jom.2009.02.002.
- Anderson J.C., Rungtusanatham M., Schroeder R.G. (1994), A theory of quality management underlying the deming management method, *Academy of Management Review*, 19(3), 472–509, DOI: 10.5465/amr.1994.9412271808.
- Andreadis E., Garza-Reyes J.A., Kumar V. (2017), Towards a conceptual framework for value stream mapping (VSM) implementation: an investigation of managerial factors, *International Journal of Production Research*, 55(23), 7073–7095, DOI:

10.1080/00207543.2017.1347302.

Aoki K. (2008), Transferring Japanese kaizen activities to overseas plants in China,

*International Journal of Operations & Production Management*, 28(6), 518–539, DOI:

10.1108/01443570810875340.

Arya A.K., Jain S.K. (2014), Impacts of Kaizen in a small-scale industry of India: A case study,

*International Journal of Lean Six Sigma*, 5(1), 22–44, DOI: 10.1108/ijlss-03-2013-0019.

Bashkite V., Karaulova T. (2012), Integration of green thinking into lean fundamentals by

theory of inventive problems-solving tools, *Annals & Proceedings of DAAAM*

*International 2012*, 23(1), 345–350.

Bashkite V., Karaulova T., Starodubtseva O. (2014), Framework for innovation-oriented

product end-of-life strategies development, *Procedia Engineering*, 69, 526–535, DOI:

10.1016/j.proeng.2014.03.022.

Basu D.R., Miroshnik V. (1999), Strategic human resource management of Japanese

multinationals – A case study of Japanese multinational companies in the UK, *Journal*

*of Management Development*, 18(9), 714–732, DOI: 10.1108/02621719910300775

Bateman N. (2005), Sustainability: the elusive element of process improvement,

*International Journal of Operations & Production Management*, 25(3), 261–276, DOI:

10.1108/01443570510581862.

Berger A. (1997), Continuous improvement and kaizen: standardization and organizational

designs, *Integrated Manufacturing Systems*, 8(2), 110–117, DOI:

10.1108/09576069710165792.

Bessant J., Caffyn S. (1997), High-involvement innovation through continuous improvement,

*International Journal of Technology Management*, 14(1), 7–28, DOI:

10.1504/ijtm.1997.001705.

Bessant J. (2003), *High-Involvement Innovation: Building and Sustaining Competitive*

*Advantage through Continuous Change*, Wiley, Chichester.

Bessant J., Caffyn S., Gilbert J., Harding R., Webb S. (1994), Rediscovering continuous

improvement, *Technovation*, 14(1), 17–29, DOI: 10.1016/0166-4972(94)90067-1.

Bhuiyan N., Baghel A., Wilson J. (2006), A sustainable continuous improvement

methodology at an aerospace company, *International Journal of Productivity and*

*Performance Management*, 55(8), 671–687, DOI: 10.1108/17410400610710206.

Bicheno J. (2001), Kaizen and Kaikaku, In: Taylor D., Brunt D. (Eds.), *Manufacturing*

*Operations and Supply Chain Management: The LEAN Approach*, Thomson Learning,

London, 175–184.

- Bisgaard S. (2007), Quality management and Juran's legacy, *Quality and Reliability Engineering International*, 23(6), 665–677, DOI: 10.1002/qre.860.
- Blazovich J.L., Smith K.T., Smith L.M. (2014), Employee- Friendly companies and work-life balance: Is there an impact on financial performance and risk level? *Journal of Organizational Culture Communications and Conflict*, 18(2).
- Bloom N., Eifert B., Mahajan A., McKenzie D., Roberts J. (2012), Does management matter? Evidence from India, *The Quarterly Journal of Economics*, 128(1), 1–51, DOI: 10.1093/qje/qjs044.
- Bortolotti T., Boscari S., Danese P. (2015), Successful lean implementation: Organizational culture and soft lean practices, *International Journal of Production Economics*, 160, 182–201, DOI: 10.1016/j.ijpe.2014.10.013.
- Bradley J.R., Willett J. (2004), Cornell students participate in Lord Corporation's Kaizen projects, *Interfaces*, 34(6), 451–459, DOI: 10.1287/inte.1040.0103.
- Broadbent P. (1994), Taking Quality to Japan, *Training for Quality*, 2(1), 4–6, DOI: 10.1108/09684879410056157
- Brown A., Eatock J., Dixon D., Meenan B.J., Anderson J. (2008), Quality and continuous improvement in medical device manufacturing, *The TQM Journal*, 20(6), 541–555, DOI: 10.1108/17542730810909329.
- Burch M.K. (2008), *Lean Longevity Kaizen Events and Determinants of Sustainable Improvement*, Amherst, MA: University of Massachusetts.
- Burke W.W. (2017), *Organization Change: Theory and Practice*, 5th Edition, Sage Publication: USA.
- Chakravorty S.S., Hales D.N. (2017), Sustainability of process improvements: An application of the experiential learning model (ELM), *International Journal of Production Research*, 55(17), 4931–4947, DOI: 10.1080/00207543.2016.1277278.
- Coimbra E. (2013), *Kaizen in Logistics and Supply Chains*, McGraw Hill Professional.
- Colenso M. (2000), Kaizen Strategies for Improving Team Performance, *Team Performance Management: An International Journal*, 6(1/2), 37–38, DOI: 10.1108/tpm.2000.6.1\_2.37.2.
- Cooney R., Sohal A. (2004), Teamwork and total quality management: A durable partnership, *Total Quality Management & Business Excellence*, 15(8), 1131–1142, DOI: 10.1080/1478336042000255442.
- Creswell J. (2001), America's elite factories, *Fortune*, 144(4):206A.
- Dabhilkar M., Bengtsson L., Bessant J. (2007), Convergence or national specificity? Testing

- the CI maturity model across multiple countries, *Creativity and Innovation Management*, 16(4), 348–362, DOI: 10.1111/j.1467-8691.2007.00449.x.
- Dale B.G., Boaden R.J., Wilcox M., McQuater R.E. (1997), Sustaining total quality management: What are the key issues? *The TQM Magazine*, 9(5), 372–380, DOI: 10.1108/09544789710178668.
- Dale B.G., Van Der Wiele T., Van Iwaarden J. (2007), *Managing quality*, John Wiley & Sons.
- De Treville S, Antonakis J. (2006), Could lean production job design be intrinsically motivating? Contextual, configurational, and levels-of-analysis issues, *Journal of Operations Management*, 24(2), 99–123, DOI: 10.1016/j.jom.2005.04.001.
- Dean J.W., Bowen D.E. (1994), Management theory and total quality: improving research and practice through theory development, *Academy of Management Review*, 19(3), 392–418, DOI: 10.5465/amr.1994.9412271803.
- Delbridge R., Barton H. (2002), Organizing for continuous improvement, *International Journal of Operations & Production Management*, 22(6), 680–692, DOI: 10.1108/01443570210427686.
- Devaraj S., Hollingworth D.G., Schroeder R.G. (2004), Generic manufacturing strategies and plant performance, *Journal of Operations Management*, 22(3), 313–333, DOI: 10.1016/j.jom.2004.03.001.
- Dombrowski U., Mielke T. (2014). Lean Leadership – 15 Rules for a Sustainable Lean Implementation, *Procedia CIRP*, 17, 565–570, DOI: 10.1016/j.procir.2014.01.146.
- Farris J.A., Aken E.M.V., Doolen T.L., Worley J. (2009), Critical success factors for human resource outcomes in Kaizen events: An empirical study, *International Journal of Production Economics*, 117(1), 42–65, DOI: 10.1016/j.ijpe.2008.08.051.
- Egelman C.D., Epple D., Argote L., Fuchs E.R., (2016), Learning by doing in multiproduct manufacturing: Variety, customizations, and overlapping product generations, *Management Science*, 62, 1-19, DOI: 10.1287/mnsc.2015.2352.
- Egelman S., Harbach M., Peer E. (2016), Behavior Ever Follows Intention? *Proceedings of the 2016 CHI Conference on Human Factors in Computing Systems - CHI '16*, DOI: 10.1145/2858036.2858265.
- Elizondo R.L., Grabot B., Ngouna R.H. (2016), Beyond productivity and continuous improvement: Fundamentals required for lean complex transformation unpublished, *IFAC-PapersOnLine 2016*, 49(12), 467–472, DOI: 10.1016/j.ifacol.2016.07.655
- Elsey B., Fujiwara A. (2000), Kaizen and technology transfer instructors as work-based learning facilitators in overseas transplants: A case study, *Journal of Workplace*

- Learning*, 12(8), 333–342, DOI: 10.1108/13665620010378831.
- Emiliani M.L. (1998), Continuous personal improvement, *Journal of Workplace Learning*, 10(1), 29–38, DOI: 10.1108/13665629810370021.
- Flumerfelt S., Siriban-Manalang A.B., Kahlen F. (2012), Are agile and lean manufacturing systems employing sustainability, complexity and organizational learning? *The Learning Organization*, 19(3), 238–247, DOI: 10.1108/09696471211219976.
- Fodness D., Murray B. (2007), Passengers' expectations of airport service quality, *Journal of Services Marketing*, 21(7), 492–506, DOI: 10.1108/08876040710824852.
- Foreman C.R., Vargas D.H. (1999), Affecting the value chain through supplier Kaizen, *Hospital Materiel Management Quarterly*, 20(3), 21–27.
- Furlan A., Vinelli A. (2018), Unpacking the coexistence between improvement and innovation in world-class manufacturing: A dynamic capability approach, *Technological Forecasting and Social Change*, 133, 168–178, DOI: 10.1016/j.techfore.2018.03.022.
- García J.L., Rivera D.G., Iniesta A.A. (2013a), Critical success factors for Kaizen implementation in manufacturing industries in Mexico, *The International Journal of Advanced Manufacturing Technology*, 68(1-4), 537–545, DOI: 10.1007/s00170-013-4750-2.
- Glover W.J., Farris J.A., Aken E.M.V. (2014), Kaizen Events: Assessing the Existing Literature and Convergence of Practices, *Engineering Management Journal*, 26(1), 39–61, DOI: 10.1080/10429247.2014.11432003.
- Glover W.J., Liu W., Farris J.A., Aken, E.M.V. (2013), Characteristics of established kaizen event programs: an empirical study, *International Journal of Operations & Production Management*, 33(9), 1166–1201, DOI: 10.1108/ijopm-03-2011-0119.
- Goh A.B., Chakpitak N. (2015), Embracing the ROFO principle before implementing Lean production: a chief operating officer's experiences and reflections, *Quality Innovation Prosperity*, 19(2), 161–181, DOI: 10.12776/QIP.V19I2.621.
- Gondhalekar S., Karamchandani V. (1994), Robust Kaizen Systems, *The TQM Magazine*, 6(3), 5–8, DOI: 10.1108/09544789410057818.
- Hashimoto K., Pillay H., Hudson P. (2010), An evaluation framework for sustaining the impact of educational development, *Studies in Educational Evaluation*, 36(3), 101–110, DOI: 10.1016/j.stueduc.2010.12.002.
- Hasle P., Bojesen A., Jensen P.L., Bramming P. (2012), Lean and the working environment: a review of the literature, *International Journal of Operations & Production Management*,

32(7), 829–849, DOI: 10.1108/01443571211250103.

Heard E. (1997), *Rapid-fire Improvement with Short-cycle Kaizen*, American Production and Inventory Control Society: Washington, DC.

Higuchi Y., Nam V.H., Sonobe T. (2015), Sustained impacts of Kaizen training, *Journal of Economic Behavior & Organization*, 120, 189–206, DOI: 10.1016/j.jebo.2015.10.009

Hilton R.J., Sohal A. (2012), A conceptual model for the successful deployment of Lean Six Sigma, *International Journal of Quality & Reliability Management*, 29(1), 54–70, DOI: 10.1108/02656711211190873.

Hino S. (2006), *Inside the mind of Toyota: Management principles for enduring growth*, Productivity Press: Newyork, USA.

Holden R.J. (2011), Lean thinking in emergency departments: A critical review, *Annals of Emergency Medicine*, 57(3), 265–278, DOI: 10.1016/j.annemergmed.2010.08.001.

Iberahim H., Mazlinda H., Marhainie M.D., Hidayah A.N. (2016), Determinants of sustainable continuous improvement practices in mail processing service operations, *Procedia - Social and Behavioral Sciences*, 219, 330–337, DOI: 10.1016/j.sbspro.2016.04.040.

Intra C., Zahn T. (2014), Transformation-waves – A brick for a powerful and holistic continuous improvement process of a lean production system, *Procedia CIRP*, 17, 582–587, DOI: 10.1016/j.procir.2014.01.097.

Jadhav J.R., Mantha S.S., Rane S.B. (2014), Exploring barriers in lean implementation, *International Journal of Lean Six Sigma*, 5(2), 122–148, DOI: 10.1108/ijlss-12-2012-0014.

Jasti N.V.K., Kodali R. (2016), An empirical study for implementation of lean principles in Indian manufacturing industry, *Benchmarking: An International Journal*, 23(1), 183–207, DOI: 10.1108/bij-11-2013-0101.

Jayamaha N.P., Wagner J.P., Grigg N.P., Campbell-Allen N.M., Harvie W. (2014), Testing a theoretical model underlying the “Toyota Way” – An empirical study involving a large global sample of Toyota facilities, *International Journal of Production Research*, 52(14), 4332–4350, DOI: 10.1080/00207543.2014.883467.

Jayaram J., Das A., Nicolae M. (2010), Looking beyond the obvious: Unraveling the Toyota production system, *International Journal of Production Economics*, 128(1), 280–291, DOI: 10.1016/j.ijpe.2010.07.024.

Jönsson S., Schölin T. (2014), Potentials facilitators of workplace learning in a TPS based company, *Journal of Management Development*, 33(10), 1004–1018, DOI: 10.1108/jmd-10-2012-0130.

- Jørgensen F., Boer H., Gertsen F. (2003), Jump-starting continuous improvement through self-assessment, *International Journal of Operations & Production Management*, 23(10), 1260–1278, DOI: 10.1108/01443570310496661.
- Jørgensen F., Boer H., Gertsen F. (2004), Development of a team-based framework for conducting self-assessment of continuous improvement, *Journal of Manufacturing Technology Management*, 15(4), 343–349, DOI: 10.1108/17410380410535044.
- Kamsu-Foguem B., Rigal F., Mauget F. (2013), Mining association rules for the quality improvement of the production process, *Expert Systems with Applications*, 40(4), 1034–1045, DOI: 10.1016/j.eswa.2012.08.039.
- Kasul R.A., Motwani J.G. (1997), Successful implementation of TPS in a manufacturing setting: A case study, *Industrial Management & Data Systems*, 97(7), 274–279, DOI: 10.1108/02635579710191707.
- Kaye M., Anderson R. (1999), Continuous improvement: the ten essential criteria, *International Journal of Quality & Reliability Management*, 16(5), 485–509, DOI: 10.1108/02656719910249801.
- Kerrin M. (2002), Continuous improvement along the supply chain: The impact of customer-supplier relations, *Integrated Manufacturing Systems*, 13(3), 141–149, DOI: 10.1108/09576060210416580.
- Kobayashi K., Fisher R., Gapp R. (2008), Business improvement strategy or useful tool? Analysis of the application of the 5S concept in Japan, the UK and the US, *Total Quality Management & Business Excellence*, 19(3), 245–262, DOI: 10.1080/14783360701600704.
- Kosandal P., Farris J. (2004), The strategic role of the kaizen event in driving and sustaining organizational change. In: *Proceedings of the 2004 American society for engineering management conference*, Alexandria, VA, 517–526.
- Kotha S., Swamidass P.M. (2000), Strategy, advanced manufacturing technology and performance: empirical evidence from US manufacturing firms, *Journal of Operations Management*, 18(3), 257–277, DOI: 10.1016/s0272-6963(99)00025-x.
- Krajewski L.J., Ritzman L.P., Malhotra M.K. (2013), *Operations Management: Processes and Supply Chains*. Pearson: USA.
- Lanigan J. (2004), A journey to the other side of lean-lean sigma yields more than just cost reductions, *Assembly-Radnor*, 47(10), 56–59.
- Lantz A., Hansen N., Antoni C. (2015), Participative work design in lean production: A strategy for dissolving the paradox between standardized work and team proactivity

- by stimulating team learning? *Journal of Workplace Learning*, 27(1), 19–33, DOI: 10.1108/jwl-03-2014-0026.
- Laraia A.C., Moody P.E., Hall R.W. (1999), *The kaizen blitz: accelerating breakthroughs in productivity and performance*, John Wiley & Sons.
- Larson M. (1998), Lantech's Kaizen diary: Monday through Friday, *Quality*, 37(6), 40.
- Letmathe P., Schweitzer M., Zielinski M. (2012), How to learn new tasks: Shop floor performance effects of knowledge transfer and performance feedback, *Journal of Operations Management*, 30(3), 221–236, DOI: 10.1016/j.jom.2011.11.001.
- Liker J.K., Hoseus M. (2010), Human Resource development in Toyota culture, *International Journal of Human Resources Development and Management*, 10(1), 34, DOI: 10.1504/ijhrdm.2010.029445.
- Liu Y., Loi R., Lam L.W. (2011), Linking organizational identification and employee performance in teams: the moderating role of team-member exchange, *The International Journal of Human Resource Management*, 22(15), 3187–3201, DOI: 10.1080/09585192.2011.560875.
- Long R.J., Shields J.L. (2005), Performance pay in Canadian and Australian firms: A comparative study, *International Journal of Human Resource Management*, 16(10):1783–1811.
- Longoni A., Cagliano R. (2015), Cross-functional executive involvement and worker involvement in lean manufacturing and sustainability alignment, *International Journal of Operations & Production Management*, 35(9), 1332–1358, DOI: 10.1108/ijopm-02-2015-0113.
- Longoni A., Pagell M., Johnston D., Veltri A. (2013), When does lean hurt?– An exploration of lean practices and worker health and safety outcomes, *International Journal of Production Research*, 51(11), 3300–3320, DOI: 10.1080/00207543.2013.765072.
- Longoni A., Cagliano R. (2015), Cross-functional executive involvement and worker involvement in lean manufacturing and sustainability alignment, *International Journal of Operations & Production Management*, 35(9), 1332–1358, DOI: 10.1108/ijopm-02-2015-0113.
- Machuca J.A. (2002), JIT facing the New Millennium, *International Journal of Production Economics*, 80(2), 131–134.
- Macpherson W.G., Lockhart J.C., Kavan H., Iaquinto A.L. (2015), Kaizen: a Japanese philosophy and system for business excellence, *Journal of Business Strategy*, 36(5), 3–9, DOI: 10.1108/jbs-07-2014-0083.



- Marin-Garcia J.A., Garcia-Sabater J.J., Bonavia T. (2009), The impact of Kaizen Events on improving the performance of automotive components' first-tier suppliers, *International Journal of Automotive Technology and Management*, 9(4):362–376, DOI: 10.1504/IJATM.2009.028524.
- Marin-Garcia J.A., Pardo del Val M., Martín T.B. (2008), Longitudinal study of the results of continuous improvement in an industrial company, *Team Performance Management: An International Journal*, 14(1/2), 56–69, DOI: 10.1108/13527590810860203.
- Marinova S.V., Peng C., Lorinkova N., Van Dyne L., Chiaburu D. (2015), Change-oriented behavior: A meta-analysis of individual and job design predictors, *Journal of Vocational Behavior*, 88, 104–120, DOI: 10.1016/j.jvb.2015.02.006.
- Marksberry P., Badurdeen F., Gregory B., Kreaflé K. (2010), Management directed kaizen: Toyota's Jishuken process for management development, *Journal of Manufacturing Technology Management*, 21(6), 670–686, DOI: 10.1108/17410381011063987.
- Martin K., Osterling M. (2007), *The Kaizen Event Planner: Achieving Rapid Improvement in Office, Service, and Technical Environments*, Productivity Press: New York, USA.
- Martin K. (2004), Kaizen events: Achieving dramatic improvement through focused attention and team-based solutions, *Society for Health Systems Newsletter*, August 2004, 6–7.
- Martínez-Jurado P.J., Moyano-Fuentes J. (2014), Lean management, supply chain management and sustainability: A literature review, *Journal of Cleaner Production*, 85, 134–150, DOI: 10.1016/j.jclepro.2013.09.042.
- Martínez-Jurado P.J., Moyano-Fuentes J., Jerez-Gómez P. (2014), Human resource management in Lean Production adoption and implementation processes: Success factors in the aeronautics industry, *BRQ Business Research Quarterly*, 17(1), 47–68, DOI: 10.1016/j.cede.2013.06.004.
- McLean R.S., Antony J., Dahlgaard J.J. (2015), Failure of Continuous Improvement initiatives in manufacturing environments: A systematic review of the evidence, *Total Quality Management & Business Excellence*, 28(3-4), 219–237, DOI: 10.1080/14783363.2015.1063414.
- McNichols T., Hassinger R., Bapst G.W. (1999), Quick and continuous improvement through Kaizen blitz, *Hospital Materiel Management Quarterly*, 20(4), 1–7.
- Meiling J., Backlund F., Johnsson H. (2012), Managing for continuous improvement in off-site construction, *Engineering, Construction and Architectural Management*, 19(2), 141–158, DOI: 10.1108/09699981211206089.

- Melnyk S. (1998) Short-term action in pursuit of long-term improvements: Introducing Kaizen Events,
- Melnyk S.A., Calantone R.J., Montabon F.L., Smith R.T. (1998), Short-term action in pursuit of long-term improvements: Introducing Kaizen events, *Production and Inventory Management Journal*, 39(4), 69–76.
- Mika G.L. (2006), *Kaizen event implementation manual*, Society of Manufacturing Engineers.
- Miller B.D. (2004), *Achievement Behaviors Within Kaizen Blitz from an Expectancy-value Perspective: An Empirical Study*, University of Houston.
- Minton E. (1998), Luke Faulstick: 'Baron of Blitz' has boundless vision of continuous improvement, *Industrial Management*, 40(1), 14–21.
- Modarress B., Ansari A., Lockwood D. (2005), Kaizen costing for lean manufacturing: A case study. *International Journal of Production Research*, 43(9), 1751–1760.
- Mor R.S., Singh S., Bhardwaj A. (2016), Learning on Lean Production: A Review of Opinion and Research within Environmental Constraints, *Operations and Supply Chain Management: An International Journal*, 9(1), 61-72.
- Narayanamurthy G, Gurumurthy A. (2016), Systemic leanness: An index for facilitating continuous improvement of lean implementation, *Journal of Manufacturing Technology Management*, 27(8), 1014–1053, DOI: 10.1108/jmtm-04-2016-0047.
- Netland T.H., Schloetzer J.D., Ferdows K. (2015), Implementing corporate lean programs: The effect of management control practices, *Journal of Operations Management*, 36, 90–102, DOI: 10.1016/j.jom.2015.03.005.
- Netland T.H. (2015), Critical success factors for implementing lean production: The effect of contingencies, *International Journal of Production Research*, 54(8), 2433–2448, DOI: 10.1080/00207543.2015.1096976.
- Nissen M.E. (1996), A focused review of the reengineering literature: Expert frequently asked questions, *Quality Management Journal*, 3(3), 52-66.
- Oliver J. (2009), Continuous improvement: Role of organisational learning mechanisms, *International Journal of Quality & Reliability Management*, 26(6), 546–563.
- Ortiz C.A. (2009), *Kaizen and Kaizen event implementation*, Pearson Education.
- Pagell M., LePine J.A. (2002), Multiple case studies of team effectiveness in manufacturing organizations, *Journal of Operations Management*, 20(5), 619–639, DOI: 10.1016/s0272-6963(02)00030-x.
- Suárez-Barraza M.F., Ramis-Pujol J. (2012), An exploratory study of 5S: A multiple case study of multinational organizations in Mexico, *Asian Journal of Quality*, 13(1), 77–99.

- Piercy N., Rich N. (2015), The relationship between lean operations and sustainable operations. *International Journal of Operations & Production Management*, 35(2), 282–315, DOI: 10.1108/ijopm-03-2014-0143.
- Pomlett L. (1994), UK Logistics – Turning Japanese? *Logistics Information Management*, 7(1), 14–16, DOI: 10.1108/09576059410052331
- Portioli-Staudacher A, Tantardini M. (2012), A lean-based ORR system for non-repetitive manufacturing, *International Journal of Production Research*, 50(12), 3257–3273, DOI: 10.1080/00207543.2011.564664.
- Prajogo D., Sohal A. (2004), Transitioning from total quality management to total innovation management: An Australian case, *International Journal of Quality & Reliability Management*, 21(8), 861–875.
- Prajogo D.I., Sohal A.S. (2004), The sustainability and evolution of quality improvement programmes- An Australian case study, *Total Quality Management & Business Excellence*, 15(2), 205–220.
- Psychogios A.G., Atanasovski J., Tsironis L.K. (2012), Lean Six Sigma in a service context, *International Journal of Quality & Reliability Management*, 29(1), 122–139, DOI: 10.1108/02656711211190909
- Putnik G.D., Putnik G.D. (2012), Lean vs agile from an organizational sustainability, complexity and learning perspective, *The Learning Organization*, 19(3), 176–182, DOI: 10.1108/09696471211219859
- Randhawa J.S., Ahuja I.S. (2018), An investigation into manufacturing performance achievements accrued by Indian manufacturing organization through strategic 5S practices, *International Journal of Productivity and Performance Management*, 67(4), 754–787, DOI: 10.1108/ijppm-06-2017-0149.
- Rapp C., Eklund J. (2002), Sustainable development of improvement activities--the long-term operation of a suggestion scheme in a Swedish company, *Total Quality Management*, 13(7), 945–969, DOI: 10.1080/0954412022000017049.
- Readman J., Bessant J. (2007), What challenges lie ahead for improvement programmes in the UK? Lessons from the CInet Continuous Improvement Survey 2003, *International Journal of Technology Management*, 37(3/4), 290–305, DOI: 10.1504/ijtm.2007.012264.
- Richardson M.L., Gurtner W.H. (1999), Contemporary organizational strategies for enhancing value in health care, *International Journal of Health Care Quality Assurance*, 12(5), 183–189, DOI: 10.1108/09526869910280339.

- Sandoval-Arzaga F., Suárez-Barraza M.F. (2010), Experts within kaizen teams: How to get the most from their knowledge, *Development and Learning in Organizations: An International Journal*, 24(4), 10–13, DOI: 10.1108/14777281011056703.
- Savolainen T. (2013), Change implementation in intercultural context: A case study of creating readiness to change, *Journal of Global Business Issues*, 7(2), 51– 58.
- Schroeder F.A., Lin C.L., Crusio W.E., Akbarian S. (2007), Antidepressant-like effects of the histone deacetylase inhibitor, sodium butyrate, in the mouse. *Biol Psychiatry*, 62(1), 55–64, DOI: 10.1016/j.biopsych.2006.06.036
- Schultz M.D., Koehler J.W., Philipps T.W., Coronel R.S. (2015), Managing the Effects of Social Media in Organizations, *SAM Advanced Management Journal*, 80(2), 42–47.
- Secchi R., Camuffo A. (2016), Rolling out lean production systems: A knowledge-based perspective, *International Journal of Operations & Production Management*, 36(1), 61–85, DOI: 10.1108/ijopm-04-2014-0194
- Shah R., Ward P.T. (2007), Defining and developing measures of lean production, *Journal of Operations Management*, 25(4), 785–805, DOI: 10.1016/j.jom.2007.01.019
- Shang G., Pheng L.S. (2013), Understanding the application of Kaizen methods in construction firms in China, *Journal of Technology Management in China*, 8(1), 18–33, DOI: 10.1108/jtmc-03-2013-0018.
- Sheridan J.H. (1997), Kaizen blitz, *Industry Week*, 246(16), 18–27.
- Sim K.L., Rogers J.W. (2008), Implementing lean production systems: Barriers to change, *Management Research News*, 32(1), 37–49, DOI: 10.1108/01409170910922014.
- Singh J., Singh H. (2015), Continuous improvement philosophy-literature review and directions, *Benchmarking: An International Journal*, 22(1), 75–119, DOI: 10.1108/bij-06-2012-0038.
- Smadi, S.A. (2009), Kaizen strategy and the drive for competitiveness: Challenges and opportunities, *Competitiveness Review: An International Business Journal*, 19(3), 203–211, DOI: 10.1108/10595420910962070.
- Staats B.R., Brunner D.J., Upton D.M. (2011), Lean principles, learning, and knowledge work: Evidence from a software services provider, *Journal of Operations Management*, 29(5), 376–390, DOI: 10.1016/j.jom.2010.11.005.
- Stadnicka D., Sakano K. (2017), Employees motivation and openness for continuous improvement: Comparative study in polish and Japanese companies, *Management and Production Engineering Review*, 8(3), 70–86, DOI: 10.1515/mper-2017-0030.
- Stewart P., Garrahan P. (1995), Employee responses to new management techniques in the

auto industry, *Work, Employment and Society*, 9(3), 517–536, DOI: 10.1177/095001709593005.

Suárez-Barraza M.F., Lingham T. (2008), Kaizen within Kaizen teams: Continuous and process improvements in a Spanish municipality, *Asian Journal on Quality*, 9(1), 1–21, DOI: 10.1108/15982688200800001

Suárez-Barraza M.F., Miguel-Dávila J.A. (2014), Assessing the design, management and improvement of Kaizen projects in local governments, *Business Process Management Journal*, 20(3), 392–411, DOI: 10.1108/bpmj-03-2013-0040.

Suárez-Barraza M.F., Ramis-Pujol J., Dahlgard-Park S.M. (2013), Changing quality of life through the Personal Kaizen approach: a qualitative study, *International Journal of Quality and Service Sciences*, 5(2), 191–207, DOI: 10.1108/ijqss-03-2013-0015.

Suárez-Barraza M.F., Ramis-Pujol J., Kerbach L. (2011), Thoughts on Kaizen and its evolution: Three different perspectives and guiding principles, *International Journal of Lean Six Sigma*, 2(4), 288–308, DOI: 10.1108/20401461111189407.

Suárez-Barraza M.F., Ramis-Pujol J. (2010), Implementation of Lean-Kaizen in the human resource service process: A case study in a Mexican public service organization, *Journal of Manufacturing Technology Management*, 21(3), 388–410, DOI: 10.1108/17410381011024359.

Susilawati A., Tan J., Bell D., Sarwar M. (2015), Fuzzy logic based method to measure degree of lean activity in manufacturing industry, *Journal of Manufacturing Systems*, 34, 1–11, DOI: 10.1016/j.jmsy.2014.09.007.

Taggart P., Kienhofer F. (2013), The effectiveness of lean manufacturing audits in measuring operational performance improvements, *The South African Journal of Industrial Engineering*, 24(2), 140–54, DOI: 10.7166/24-2-749.

Tanner C., Roncarti R. (1994), Kaizen leads to breakthroughs in responsiveness- and the Shingo prize- at Critikon, *National Productivity Review*, 13(4), 517–531, DOI: 10.1002/npr.4040130406.

Taylor D.L., Ramsey R.K. (1993), Empowering employees to 'just do it', *Training and Development*, 47 (5), 71–76.

Timans W., Ahaus K., van Solingen R., Kumar M., Antony J. (2016), Implementation of continuous improvement based on Lean Six Sigma in small- and medium-sized enterprises, *Total Quality Management & Business Excellence*, 27(3-4), 309–324, DOI: 10.1080/14783363.2014.980140.

Tortorella G.L., Vergara L.G.L., Ferreira E.P. (2017), Lean manufacturing implementation: An

- assessment method with regards to socio-technical and ergonomics practices adoption, *The International Journal of Advanced Manufacturing Technology*, 89(9-12), 3407–3418, DOI: 10.1007/s00170-016-9227-7.
- Treece J.B. (1993), Improving the soul of an old machine, *Business Week*, 3342, 134.
- Truss C., Shantz A., Soane E., Alfes K., Delbridge R. (2013), Employee engagement, organisational performance and individual well-being: Exploring the evidence, developing the theory, *The International Journal of Human Resource Management*, 24(14), 2657–2669, DOI: 10.1080/09585192.2013.798921.
- Upton D. (1996), Mechanism for building and sustaining operations improvement, *European Management Journal*, 14(3), 215–228, DOI:10.1016/0263-2373(96)00002-3.
- Vonk J. (2005), Process improvement in business permits through kaizen, *Spectrum: Journal of State Government*, 78(2), 33–34.
- Vosloban R., Vrabuța M., Aldea R. (2013), Confronting the Consequences of a Permanent Changing environment, *Manager Journal*, 17(1), 168–174.
- Webb P.B., Bryant H.L. (1993), The challenge of kaizen technology for American business competition, *Journal of Organizational Change Management*, 6(4), 9–16, DOI: 10.1108/09534819310042704
- Whitehead D.F. (2007), *A Home-Based Intervention to Promote Physical Activity in Low Income African American Adults*, Louisiana State University.
- Wilkinson B., Gamble J., Humphrey J., Morris J., Anthony D. (2001), The new international division of labour in Asian electronics: Work organization and human resources in Japan and Malaysia, *Journal of Management Studies*, 38(5), 675–695, DOI: 10.1111/1467-6486.00254.
- Wittenberg G. (1994), Kaizen—The many ways of getting better, *Assembly Automation*, 14(4), 12–17, DOI: 10.1108/EUM0000000004213.
- Womack J.P., Jones D.T. (1996), Beyond Toyota: How to root out waste and pursue perfection, *Harvard Business Review*, 74(5), 140–158.
- Womack S.K., Armstrong T.J., Liker J.K. (2009), Lean job design and musculoskeletal disorder risk: A two plant comparison, *Human Factors and Ergonomics in Manufacturing*, 19(4), 279–293, DOI: 10.1002/hfm.20159.
- Yamamoto Y., Bellgran M. (2010), Fundamental mindset that drives improvements towards lean production, *Assembly Automation*, 30(2), 124–130, DOI: 10.1108/01445151011029754.
- Yang S., Hamann K., Haefner B., Wu C., Lanza G. (2018), A method for improving production

management training by integrating an industry 4.0 innovation center in China, *Procedia Manufacturing*, 23, 213–218, DOI: 10.1016/j.promfg.2018.04.019.

Yokozawa K., Steenhuis H.J. (2013), The influence of national level factors on international Kaizen transfer: An exploratory study in The Netherlands, *Journal of Manufacturing Technology Management*, 24(7), 1051–1075, DOI: 10.1108/jmtm-05-2011-0046.

Yuan H., Shen L. (2011), Trend of the research on construction and demolition waste management, *Waste Management*, 31(4), 670–679, DOI: 10.1016/j.wasman.2010.10.030.

## APPENDIX II

Table II.1- Constructs and References

| Construct                                           | References                                                                                                                                                                                                                                                                                                                                                                                                                                                                                                                                                                                                                                                                                                                                                                                                                                                                                                                                                                                                                                                                                                                                                                                                                                                                                                                                                                                                                                                                                                                                                                                                                                                                                                                                                                                                                                                                                                                                                                                                                                                                                                                                                                                           |
|-----------------------------------------------------|------------------------------------------------------------------------------------------------------------------------------------------------------------------------------------------------------------------------------------------------------------------------------------------------------------------------------------------------------------------------------------------------------------------------------------------------------------------------------------------------------------------------------------------------------------------------------------------------------------------------------------------------------------------------------------------------------------------------------------------------------------------------------------------------------------------------------------------------------------------------------------------------------------------------------------------------------------------------------------------------------------------------------------------------------------------------------------------------------------------------------------------------------------------------------------------------------------------------------------------------------------------------------------------------------------------------------------------------------------------------------------------------------------------------------------------------------------------------------------------------------------------------------------------------------------------------------------------------------------------------------------------------------------------------------------------------------------------------------------------------------------------------------------------------------------------------------------------------------------------------------------------------------------------------------------------------------------------------------------------------------------------------------------------------------------------------------------------------------------------------------------------------------------------------------------------------------|
| <b><i>Supports from senior management (SUP)</i></b> | <p>Andreadis et al. (2017); McLean et al. (2017); Abolhassani et al. (2016); Elizondo et al. (2016); Netland (2016); Timans et al. (2016); Bortolotti et al. (2015); Longoni &amp; Cagliano (2015); Singh &amp; Singh (2015); Bashkite et al. (2014); Dombrowski et al. (2014); García et al. (2014); Glover et al. (2014); Jadhav et al. (2014); Jayamaha et al. (2014); Josson &amp; Scholin (2014); Coimbra (2013); Garcia et al. (2013); Glover et al. (2013); Holtskog (2013); Kamsu-Foguem et al. (2013); Krajewski et al. (2013); Shang and Pheng (2013); Bashkite and Karaulova (2012); Hilton &amp; Sohal (2012); Suárez-Barraza &amp; Ramis-Pujol (2012); Portioli-Staudacher &amp; Tantardini (2012); Psychogios et al. (2012); Suárez-Barraza et al. (2011a); Garcia-Sabater &amp; Marin-Garcia (2011); Holden (2011); Aken et al. (2010); Aken et al. (2010); Hashimoto et al. (2010); Jayaram et al. (2010); Marksberry et al. (2010); Marin-Garcia et al. (2009); Smadi (2009); Aoki (2008); Brown et al. (2008); Burch (2008); Doolen et al. (2008); Doolen et al. (2008); Marin-Garcia et al. (2008); Sim &amp; Rogers (2008); Adamson &amp; Kwolek (2007); Bhuiyan et al. (2007); Dale et al. (2007); Fodness &amp; Murray (2007); Readman (2007); Hino (2006); Mika (2006); Bateman (2005); Long &amp; Shields (2005); Vonk (2005); Bradley &amp; Willett (2004); Cooney &amp; Sohal (2004); Devaraj et al. (2004); Jorgensen et al. (2004); Kumar &amp; Harms (2004); Lanigan (2004); Martin (2004); Prajogo &amp; Sohal (2004); Bateman &amp; Rich (2003); Bessant (2003); Delbridge &amp; Barton (2002); Rapp &amp; Eklund (2002); Rapp &amp; Eklund (2002); Bicheno (2001); Creswell (2001); Wilkinson et al. (2001); Foreman &amp; Vargas (1999); Laraia et al. (1999); McNichols et al. (1999); Richardson &amp; Gurtner (1999); Melnyk (1998); Melnyk et al. (1998); Minton (1998); Adams et al. (1997); Berger (1997); Heard (1997); Kasul &amp; Motwani (1997); Sheridan (1997); Upton (1996); Bessant et al. (1994); Dean &amp; Bowen (1994); Tanner &amp; Roncarti (1994); Wittenberg (1994); Taylor &amp; Ramsey (1993); Treece (1993); Webb &amp; Bryant (1993).</p> |
| <b><i>Training (TRA)</i></b>                        | <p>Furlan &amp; Vinelli (2018); Yang et al. (2018) Andreadis et al. (2017); Chakravorty &amp; Hales (2017); McLean et al. (2017); Abolhassani et al. (2016); Egelman et al. (2016); Elizondo et al. (2016); Jasti &amp; Kodali (2016); Narayanamurthy &amp; Gurumurthy (2016); Netland (2016); Higuchi et al. (2015); Piercy &amp; Rich (2015); Susilawati et al. (2015); Dombrowski et al. (2014); Intra &amp; Zahn (2014); Jadhav et al. (2014); Jayamaha et al. (2014); Martínez-Jurado et al. (2014); Bloom et al. (2013); Garcia et al. (2013); Glover et al. (2013); Longoni et al. (2013); Suárez-Barraza et al. (2013); Hilton &amp; Sohal (2012); Meiling et al. (2012); Psychogios et al. (2012); Anand &amp; Kodali (2010); Marksberry et al. (2010); Sandoval-Arzaga &amp; Suárez-Barraza (2010); Anand et al. (2009); Aoki (2008); Sim &amp; Rogers (2008); Adamson &amp; Kwolek (2007); De-Treville &amp; Antonakis (2006); Bateman (2005); Prajogo &amp; Sohal (2004b); Kosandal &amp; Farris (2004); Rapp &amp; Eklund (2002); Kotha &amp; Swamidass (2000); Adler et al. (1999); Basu and Miroshnik (1999); Emiliani (1998); Melnyk et al. (1998); Broadbent (1994).</p>                                                                                                                                                                                                                                                                                                                                                                                                                                                                                                                                                                                                                                                                                                                                                                                                                                                                                                                                                                                                            |



|                              |                                                                                                                                                                                                                                                                                                                                                                                                                                                                                                                                                                                                                                                                                                                                                                                                                                                                                                                                                                                                                                                                                                                                                                                                                                                                           |
|------------------------------|---------------------------------------------------------------------------------------------------------------------------------------------------------------------------------------------------------------------------------------------------------------------------------------------------------------------------------------------------------------------------------------------------------------------------------------------------------------------------------------------------------------------------------------------------------------------------------------------------------------------------------------------------------------------------------------------------------------------------------------------------------------------------------------------------------------------------------------------------------------------------------------------------------------------------------------------------------------------------------------------------------------------------------------------------------------------------------------------------------------------------------------------------------------------------------------------------------------------------------------------------------------------------|
| <b>Environment<br/>(ENV)</b> | Furlan & Vinelli (2018); Randhawa & Ahuja (2018); Stadnicka & Sakano (2017); Tortorella et al. (2017); Jasti & Kodali (2016); Netland (2016); Goh & Chakpitak (2015); Lantz et al. (2015); Macpherson et al. (2015); Marinova et al. (2015); Piercy & Rich (2015); Arya & Jain (2014); Jadhav et al. (2014); Yokozawa & Steenhuis (2013a); Longoni et al. (2013); Suárez-Barraza et al. (2013); Bashkite & Karaulova (2012); Hasle et al. (2012); Putnik & Putnik (2012); Burke (2011); Garcia-Sabater & Marin-Garcia (2011); Liker & Hoseus (2010); Oliver (2009); Ortiz (2009); Womack et al. (2009); Sim & Rogers (2008); Adamson & Kwolek (2007); Dabhilkar et al. (2007); Martin & Osterling (2007); Hino (2006); Bateman (2005); Modarress et al. (2005); Vonk (2005); Bateman & Rich (2003); Jørgensen et al. (2003); Machuca (2002); Pagell & LePine (2002); Bicheno (2001); Colenso (2000); Elsey & Fujiwara (2000); Adler et al. (1999); Ahmed et al. (1999); Foreman & Vargas (1999); McNichols et al. (1999); Emiliani (1998); Larson (1998); Melnyk et al. (1998); Minton (1998); Heard (1997); Sheridan (1997); Nissen (1996); Anderson et al. (1994); Gondhalekar & Karamchandani (1994); Tanner & Roncarti (1994); Taylor & Ramsey (1993); Treece (1993). |
| <b>Assessment<br/>(AST)</b>  | Furlan & Vinelli (2018); Yang et al. (2018) Chakravorty & Hales (2017); Mor et al. (2016); Netland (2016); Lantz et al. (2015); Netland (2015); Arya & Jain (2014); Suárez-Barraza & Miguel-Dávila (2014); Garcia et al. (2013); Taggart & Kienhofer (2013); Letmathe et al. (2012); Holden (2011); Staats et al. (2011); Yuan & Shen (2011); Aken et al. (2010); Marksberry et al. (2010); Sandoval-Arzaga & Suárez-Barraza (2010); Kobayashi et al. (2008); Readman (2007); Readman & Bessant (2007); Schroeder et al. (2007); Alukal & Manos (2006); De-Treville & Antonakis (2006); Miller (2004); Bateman & David (2002); Kerrin (2002); Bicheno (2001); Colenso (2000); Emiliani (1998); Larson (1998); Melnyk (1998); Pomlett (1994); Webb & Bryant (1993).                                                                                                                                                                                                                                                                                                                                                                                                                                                                                                        |
| <b>Motivation<br/>(MOT)</b>  | Chakravorty & Hales (2017); Stadnicka & Sakano (2017); Stadnicka & Sakano (2017); Tortorella et al. (2017); Elizondo et al. (2016); Goh & Chakpitak (2015); Macpherson et al. (2015); Netland et al. (2015); Piercy & Rich (2015); Susilawati et al. (2015); Dombrowski et al. (2014); García et al. (2014); Holtskog (2013); Longoni et al. (2013); Garcia-Sabater & Marin-Garcia (2011); Farris et al. (2009); Suárez-Barraza & Lingham (2008); Whitehead (2007); Alukal & Manos (2006); Hino (2006); Bateman (2005); Martin (2004); Bateman & Rich (2003); Colenso (2000); Foreman & Vargas (1999); Emiliani (1998); Larson (1998); Melnyk et al. (1998); Adams et al. (1997); Womack & Jones (1996); Tanner & Roncarti (1994); Wittenberg (1994); Taylor & Ramsey (1993).                                                                                                                                                                                                                                                                                                                                                                                                                                                                                             |
| <b>Engagement<br/>(ENG)</b>  | Furlan & Vinelli (2018); Randhawa & Ahuja (2018); Andreadis et al. (2017); Chakravorty & Hales (2017); Stadnicka & Sakano (2017); Stadnicka & Sakano (2017); Tortorella et al. (2017); Abolhassani et al. (2016); Iberahim et al. (2016); Maalouf & Gammelgaard (2016); Narayanamurthy & Gurumurthy (2016); Secchi & Camuffo (2016); Timans et al. (2016); Lantz et al. (2015); Longoni & Cagliano (2015); Netland (2015); Piercy & Rich (2015); Schultz et al. (2015); Blazovich (2014); Dombrowski et al. (2014); Intra & Zahn (2014); Jayamaha et al. (2014); Jossen & Scholin (2014); Holtskog (2013); Savolainen (2013); Truss et al. (2013); Vosloban et al. (2013); Flumerfelt et al. (2012); Hilton & Sohal (2012); Garcia-Sabater & Marin-Garcia (2011); Suárez-Barraza & Ramis-Pujol (2010); Marin-Garcia et al. (2009); Sim & Rogers (2008); Shah & Ward (2007); De-Treville & Antonakis (2006); Bateman & Rich (2003); Adler et al. (1999); Stewart & Garrahn (1995).                                                                                                                                                                                                                                                                                         |
